# Supplementary material
Source: MDPI journal article supplement (https://www.mdpi.com/2227-9040/10/6/203)

## Supplementary Figure

### Kinetics of odorant recognition with a graphene-based olfactory receptor mimicry

Caroline Bonazza, Klaus Bonazza

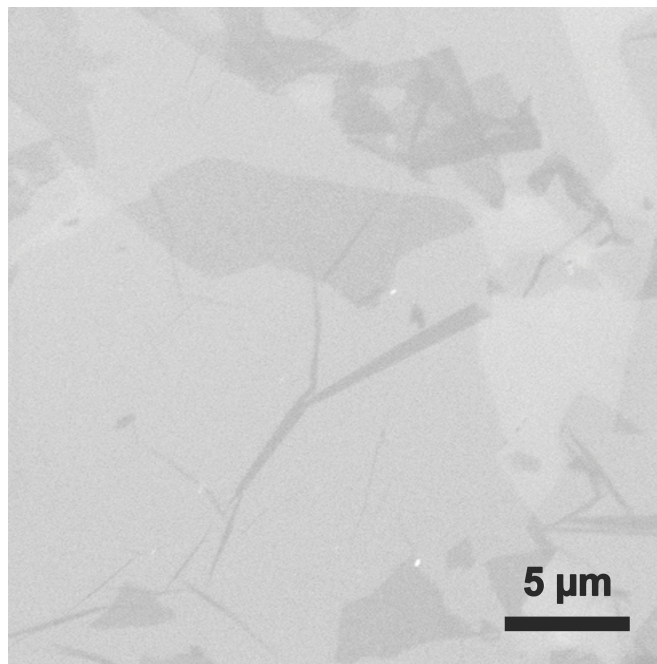

Supplement: s1 [file s1]
